# Supplementary material for: Prognostic Factors of Early Stage Epithelial Ovarian Carcinoma
Source: MDPI journal article supplement (doi:10.3390/ijerph16040637), 2019-02-21
Supplement: s1 [file s1]

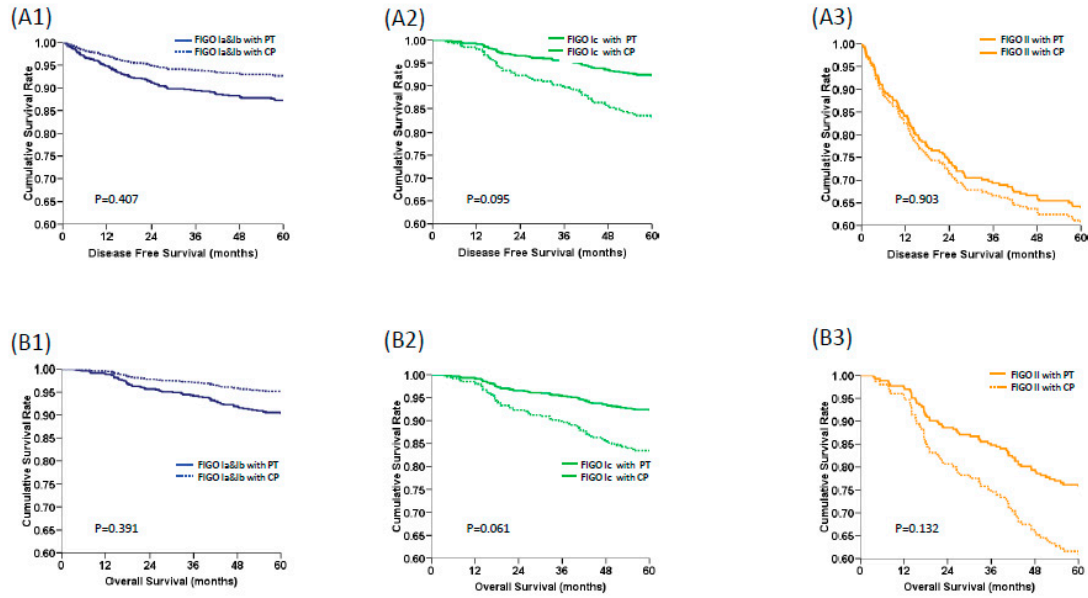

**Supplementary Figure 1.** Survival curves of 437 early stage epithelial ovarian carcinoma women stratified by chemotherapeutic regimens and FIGO stage in multivariate Cox regression models after adjusting for histologic types, tumor grade, and age at diagnosis. **(A)** Estimated 5-year disease-free survival (DFS) curves. A1: stages Ia/Ib, A2: stage Ic, A3: stage II. There was no difference in 5-year DFS between the platinum and paclitaxel (PT) or platinum and cyclophosphamide (CP) regimens for the different stages: stages Ia/Ib (87.1% vs. 92.5%, aHR=1.76, 95% CI=0.46-6.64 p=0.407), stage Ic (82.8% vs. 74.7%, aHR=0.62, 95% CI=0.36-1.08, p=0.095), stage II (63.8% vs. 60.7%, aHR=0.95, 95% CI= 0.46-1.99, p=0.903). **(B)** Estimated 5-year overall survival (OS) curves. B1: stages Ia/Ib, B2: stage Ic, B3: stage II. The 5-year OS of PT and CP regimens did not differ in all three stages: in stages Ia/Ib (90.4% vs. 95.0%, aHR=2.02, 95% CI=0.41-10.0, p=0.391), stage Ic (91.5% vs. 83.4%, aHR=0.49, 95% CI=0.23-1.03, p=0.061), and stage II (75.3% vs. 61.0%, aHR=0.56, 95% CI=0.27-1.19, p=0.132) (all by log-rank test).

**Supplementary Table 1.** Clinicopathologic characteristics of 437 early stage ovarian cancer women by hospitals.

| Characteristics   | Total (n = 437) |      | NTUH (n = 248) |      | VGH-TP (n = 189) |      |
|-------------------|-----------------|------|----------------|------|------------------|------|
|                   | Number          | %    | Number         | %    | Number           | %    |
| Year of Diagnosis |                 |      |                |      |                  |      |
| 2000-2005         | 192             | 43.9 | 106            | 42.7 | 86               | 45.5 |
| 2006-2010         | 245             | 56.1 | 142            | 57.3 | 103              | 54.5 |
| Age               |                 |      |                |      |                  |      |
| Mean (SD)         | 50.1 (11.0)     |      | 49.9 (11.2)    |      | 50.4 (10.8)      |      |
| ≤50               | 234             | 53.5 | 131            | 52.8 | 103              | 54.5 |
| >50               | 203             | 46.5 | 117            | 47.2 | 86               | 45.5 |
| FIGO stage        |                 |      |                |      |                  |      |
| Ia and Ib         | 101             | 23.1 | 41             | 16.5 | 60               | 31.7 |
| Ic                | 244             | 55.8 | 165            | 66.5 | 79               | 41.8 |
| II                | 92              | 21.1 | 42             | 16.9 | 50               | 26.5 |
| Histology         |                 |      |                |      |                  |      |
| Serous            | 61              | 14.0 | 34             | 13.7 | 27               | 14.3 |
| Mucinous          | 58              | 13.3 | 31             | 12.5 | 27               | 14.3 |
| Endometrioid      | 119             | 27.2 | 63             | 25.4 | 56               | 29.6 |
| Clear cell        | 164             | 37.5 | 102            | 41.1 | 62               | 32.8 |
| Others *          | 35              | 8.0  | 18             | 7.3  | 17               | 9.0  |
| Tumor grade       |                 |      |                |      |                  |      |
| I                 | 88              | 20.1 | 75             | 30.2 | 13               | 6.9  |

|                                       |                 |      |                 |      |                 |      |
|---------------------------------------|-----------------|------|-----------------|------|-----------------|------|
| II                                    | 102             | 23.3 | 26              | 10.5 | 76              | 40.2 |
| III #                                 | 247             | 56.5 | 147             | 59.3 | 100             | 52.9 |
| Adjuvant therapy                      |                 |      |                 |      |                 |      |
| PT                                    | 249             | 57.0 | 106             | 42.7 | 143             | 75.7 |
| CP                                    | 188             | 43.0 | 142             | 57.3 | 46              | 24.3 |
| Regimens and<br>number of cycles      |                 |      |                 |      |                 |      |
| PT (6)                                | 192             | 43.9 | 88              | 35.5 | 104             | 55.0 |
| PT (3-5)                              | 57              | 13.0 | 18              | 7.3  | 39              | 20.6 |
| CP (6)                                | 137             | 31.4 | 107             | 43.1 | 30              | 15.9 |
| CP (3-5)                              | 51              | 11.7 | 35              | 14.1 | 16              | 8.5  |
| Follow-up period<br>mean (SD), months | 85.9 (43.5)     |      | 86.3 (42.9)     |      | 85.3 (44.4)     |      |
| Outcome                               |                 |      |                 |      |                 |      |
| 5-yr recurrence rate (%)              | 94/426 (22.1%)  |      | 52/243 (21.4%)  |      | 42/183 (23.0%)  |      |
| 5-yr survival rate<br>(%)             | 367/432 (85.0%) |      | 205/247 (83.0%) |      | 162/185 (87.6%) |      |

---

Abbreviation: SD, Standard deviation; \*Others include serous mixed mucinous, serous mixed clear cell, mucinous mixed endometrioid, mucinous mixed clear cell, endometrioid mixed clear cell, poorly-differentiated, transitional, hepatoid, and small and squamous cell carcinoma. #All of the clear cell cases were regarded as grade 3; CP, Cyclophosphamide + Platinum; PT, Paclitaxel + Platinum; yr, year.
